# Supplementary material for: A new type of 3D [(MII)2(TCNQ−II)3]2−coordination network with spacious channels of hexagonal cross-section generated from TCNQH2
Source: Royal Society of Chemistry journal article supplement (doi:10.1039/c1ce06104f), 2011-11-18

**A new type of 3D  $[(M^{II})_2(TCNQ^{-II})_3]^{2-}$  coordination network with spacious  
channels of hexagonal cross-section generated from TCNQH<sub>2</sub>**

Brendan F. Abrahams\*, Robert W. Elliott, Timothy A. Hudson and Richard Robson\*

School of Chemistry, University of Melbourne, Parkville, Victoria 3010, Australia

**Supplementary Information**

- S1. X-ray powder diffraction data
- S2. Thermogravimetric analyses

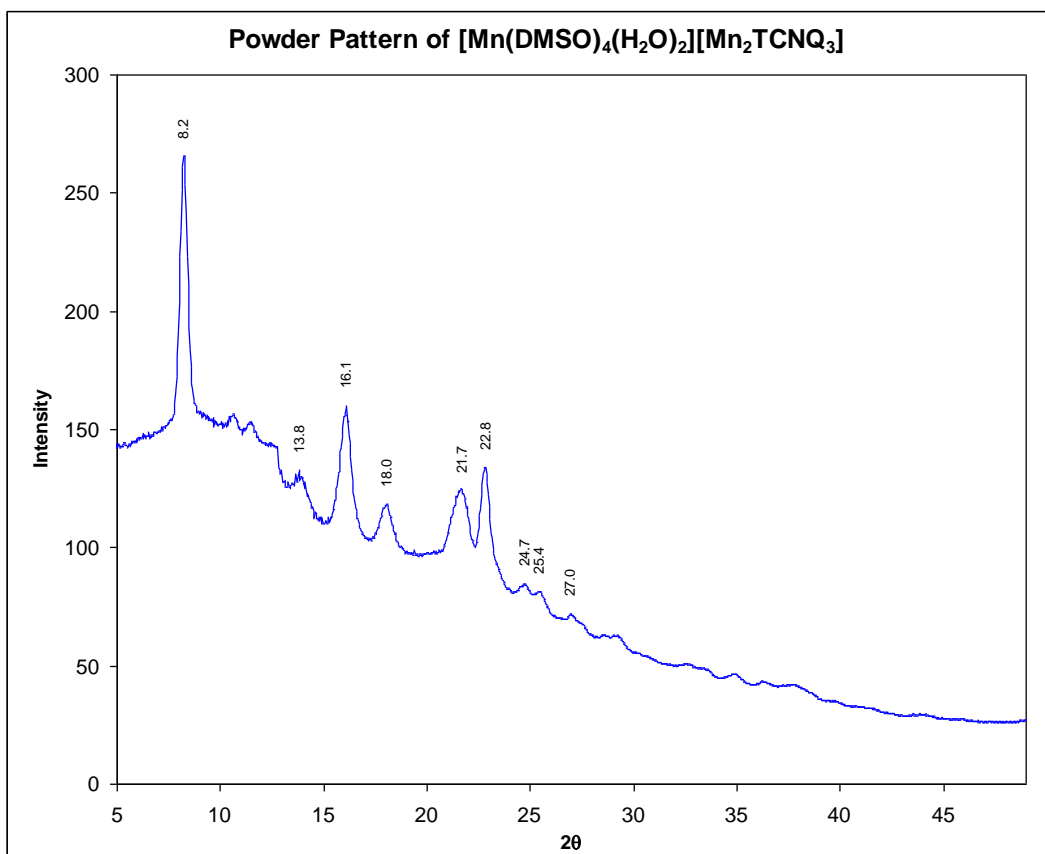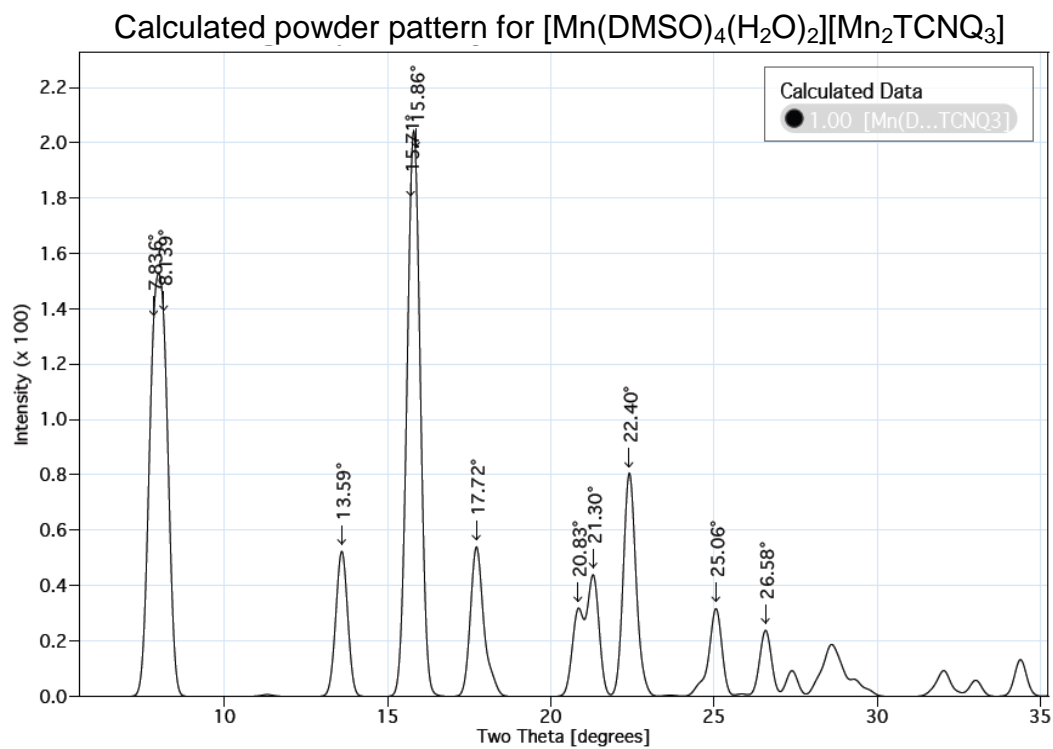

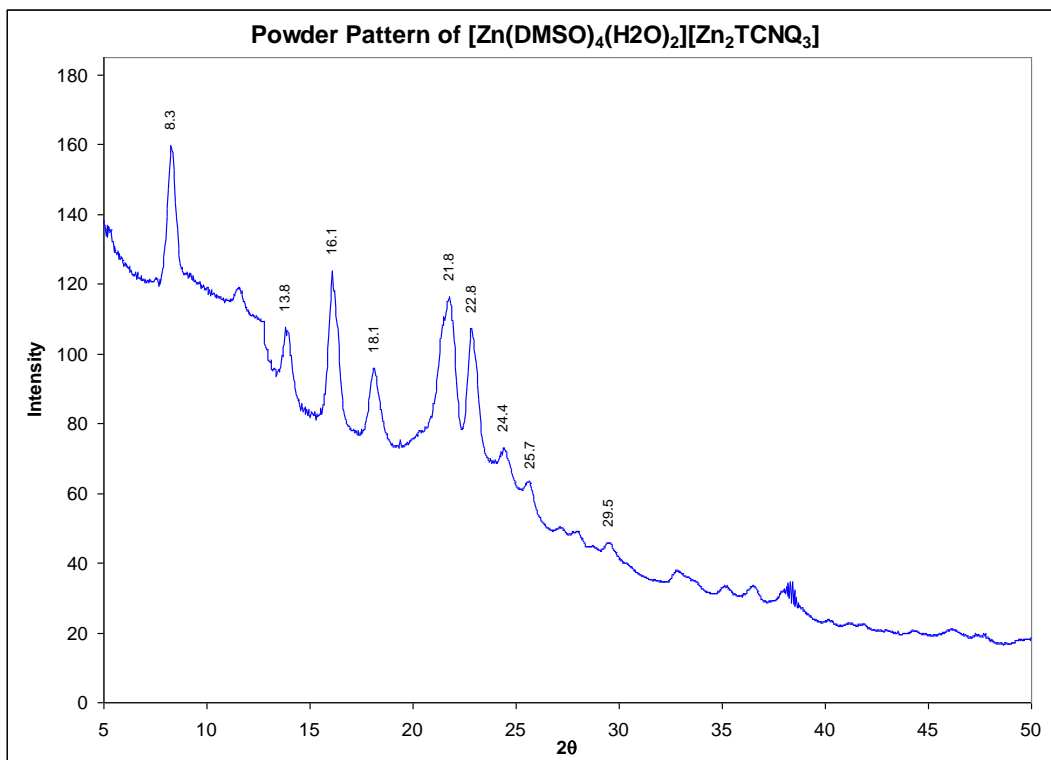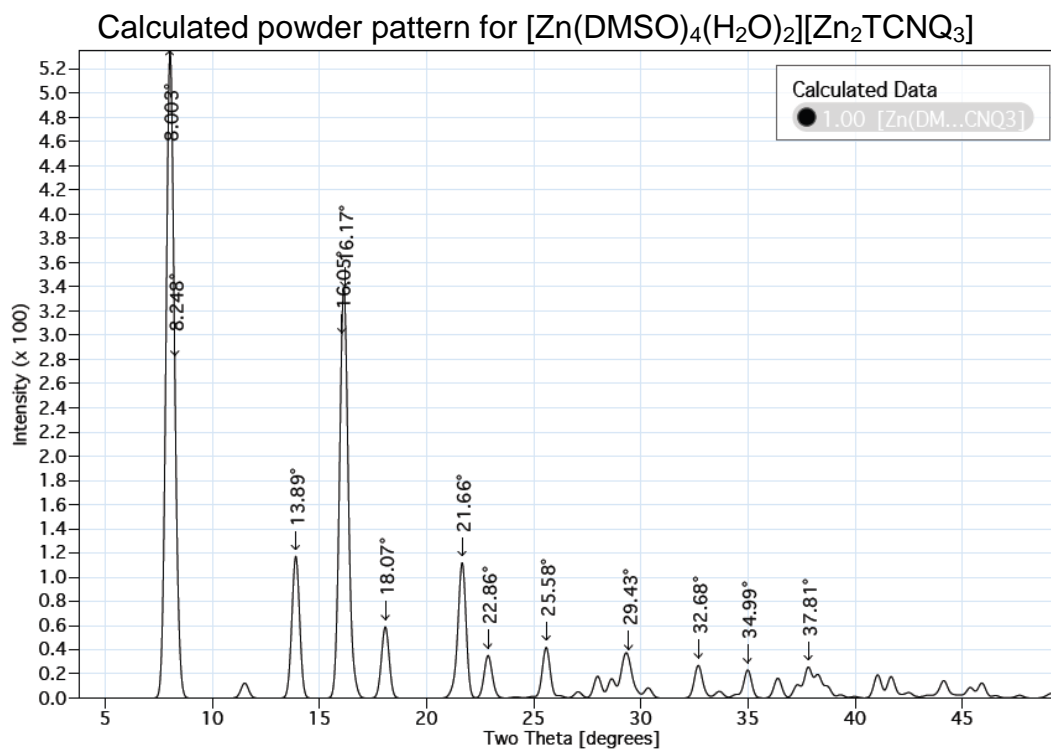

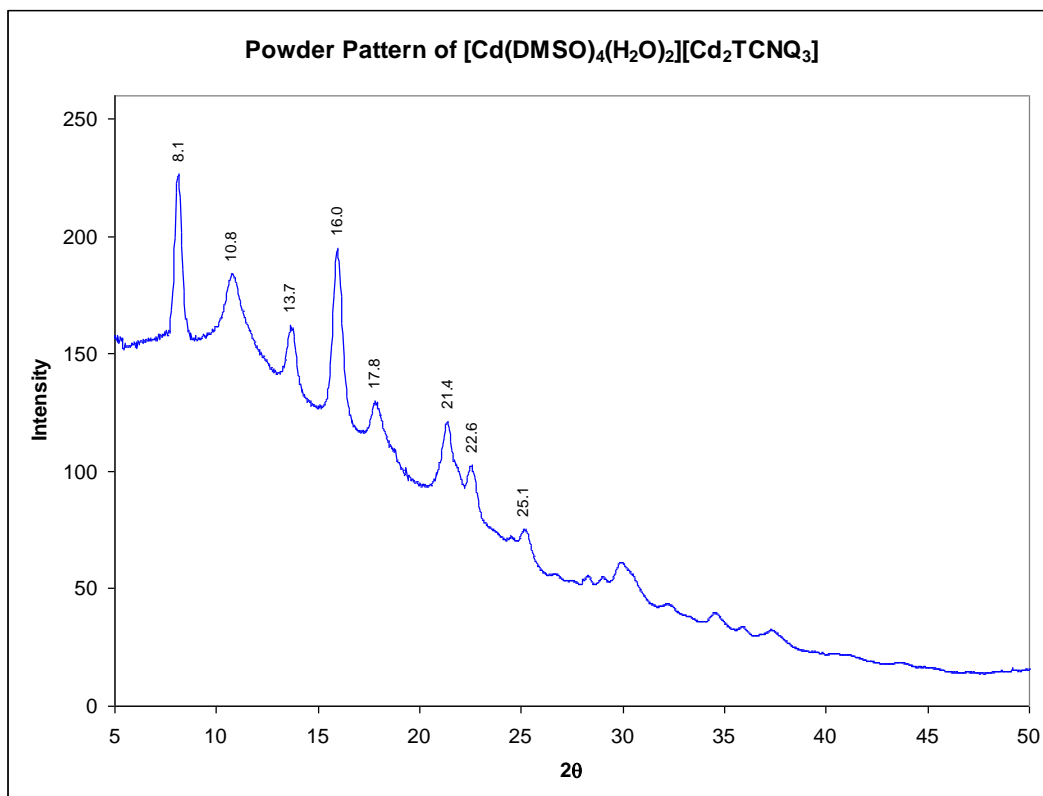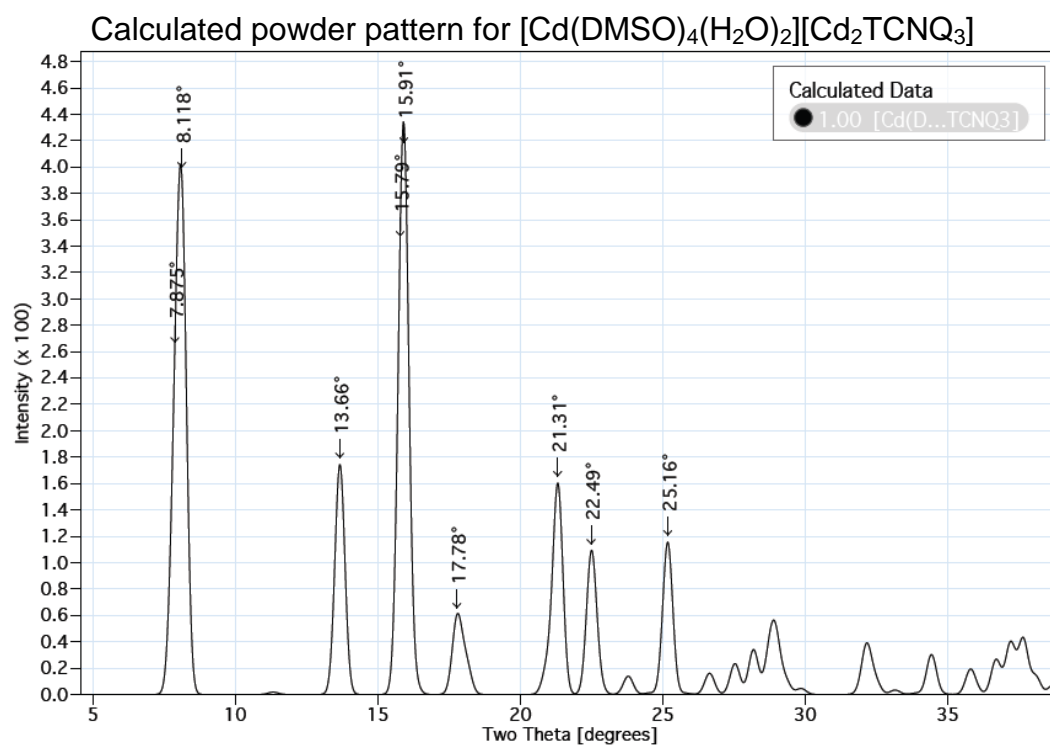

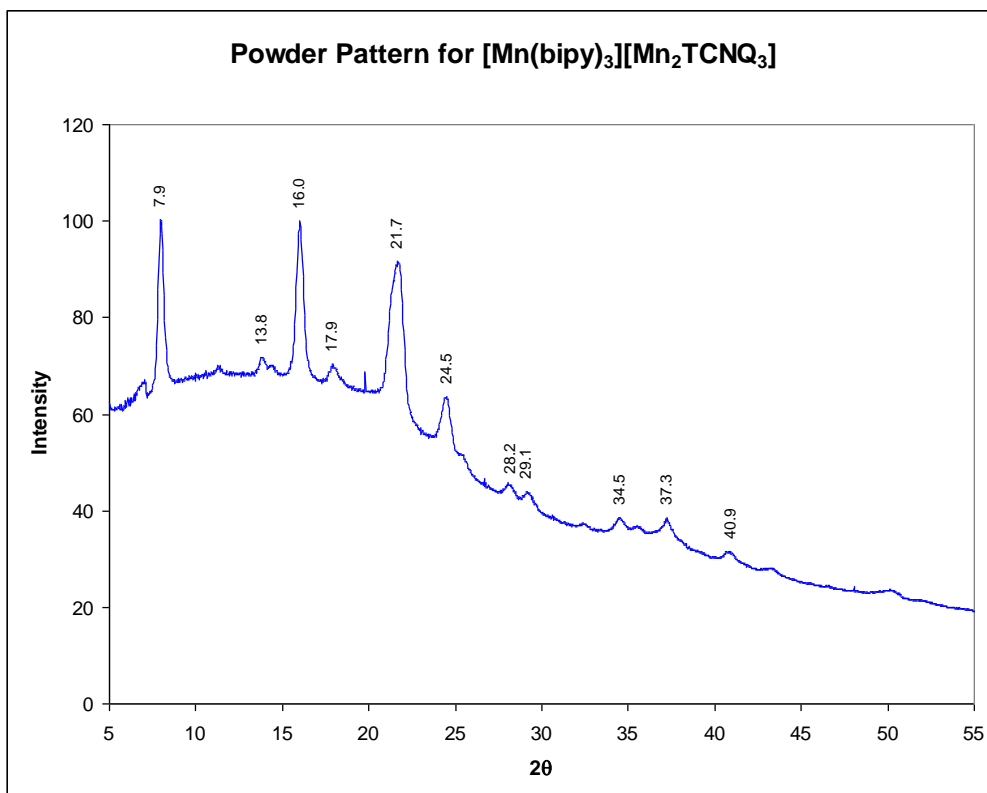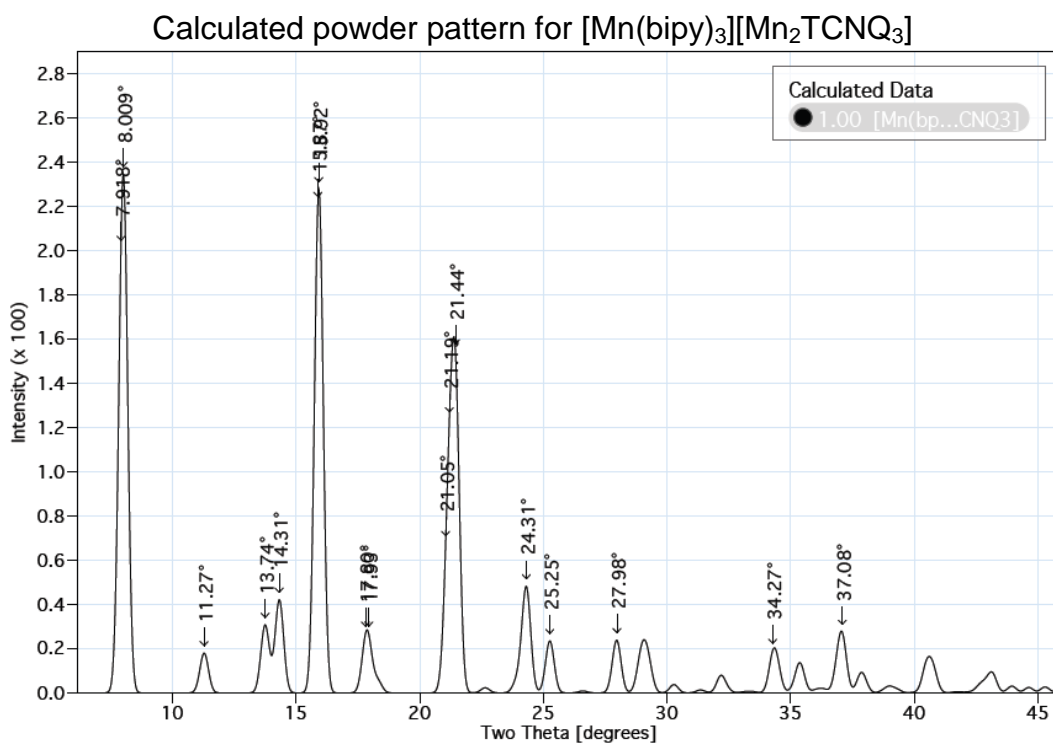

## S2. Thermogravimetric trace for $[\text{Mn}(\text{DMSO})_4(\text{H}_2\text{O})_2][\text{Mn}_2(\text{TCNQ})_3]$

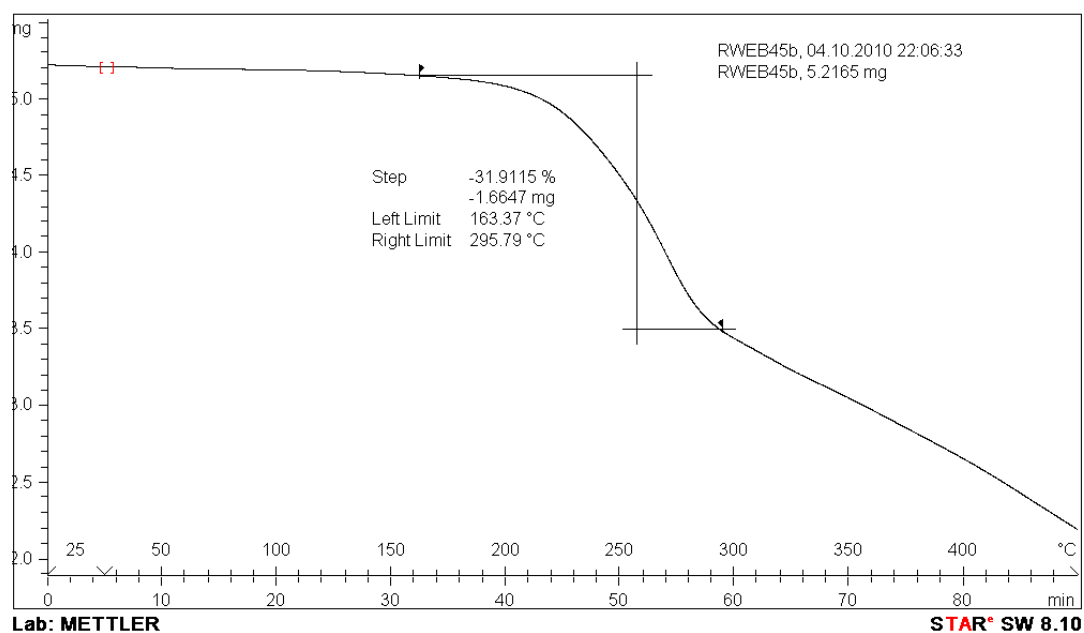

## Thermogravimetric trace for $[\text{Mn}(\text{bipy})_3][\text{Mn}_2(\text{TCNQ})_3]$

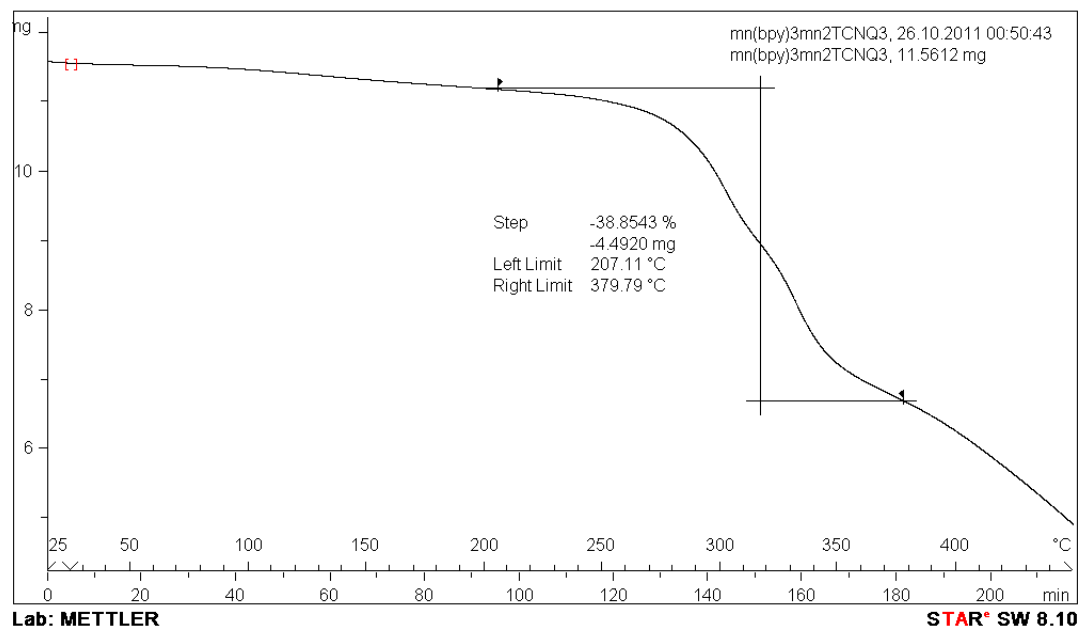

Supplement: c1ce06104f.pdf [file c1ce06104f.pdf]
